# Supplementary material
Source: publisher figshare collection journal article supplement (https://tandf.figshare.com/articles/dataset/_/4003575)
Supplement: Supplementary file 1 [file 1]

Supplementary Table 2. U-Pb isotopic results for samples of the Castelo dos Sonhos Formation

|  |  |  |  |  |  |  |  |  |  |  | **Apparent ages (Ma)** | | | | | | **Concordance %** | |
| --- | --- | --- | --- | --- | --- | --- | --- | --- | --- | --- | --- | --- | --- | --- | --- | --- | --- | --- |
| **Zircon** | **f206(%)** | **Th** | **206Pb** | **207Pb** | **err (%)** | **207Pb** | **err (%)** | **206Pb** | **err (%)** | **Rho** | **207Pb** |  | **207Pb** |  | **206Pb** |  | **6/8-7/6** | **6/8-7/5** |
|  |  | **U** | **204Pb** | **206Pb** | **1sigma** | **235U** | **1sigma** | **238U** | **1sigma** |  | **206Pb** | **1s** | **235U** | **1s** | **238U** | **1s** |  |  |
| *SG30* | *Metasandstone (Ironstone)* | | | | | | | | | | | | | | | | | |
| Z01 | 0.03 | 0.78 | 43987 | 0.130131 | 0.44 | 6.891 | 2.29 | 0.384037 | 2.25 | 0.98 | 2100 | 8 | 2097 | 20 | 2095 | 40 | 99.78 | 99.8 |
| Z02-1 | 0.09 | 0.31 | 17360 | 0.128597 | 0.51 | 6.495 | 1.97 | 0.366329 | 1.90 | 0.97 | 2079 | 9 | 2045 | 17 | 2012 | 33 | 96.79 | 98.3 |
| Z02-2 | 0.03 | 0.18 | 46426 | 0.132014 | 0.64 | 6.415 | 3.39 | 0.352436 | 3.33 | 0.98 | 2125 | 11 | 2034 | 29 | 1946 | 56 | 91.59 | 95.6 |
| Z03 | 0.03 | 0.39 | 41327 | 0.227152 | 0.46 | 17.055 | 1.68 | 0.544541 | 1.61 | 0.96 | 3032 | 7 | 2938 | 16 | 2802 | 37 | 92.43 | 95.3 |
| Z04 | 0.03 | 0.17 | 44430 | 0.191280 | 0.57 | 13.322 | 1.33 | 0.505136 | 1.21 | 0.91 | 2753 | 9 | 2703 | 13 | 2636 | 26 | 95.74 | 97.5 |
| Z08 | 0.05 | 1.23 | 29727 | 0.192935 | 0.54 | 11.644 | 1.93 | 0.437727 | 1.85 | 0.96 | 2767 | 9 | 2576 | 18 | 2340 | 36 | 84.57 | 90.8 |
| Z09 | 0.02 | 0.25 | 63301 | 0.190205 | 0.36 | 12.938 | 1.17 | 0.493356 | 1.12 | 0.95 | 2744 | 6 | 2675 | 11 | 2585 | 24 | 94.21 | 96.6 |
| Z10 | 0.02 | 0.26 | 61088 | 0.188050 | 0.37 | 12.466 | 1.43 | 0.480788 | 1.39 | 0.97 | 2725 | 6 | 2640 | 13 | 2531 | 29 | 92.86 | 95.8 |
| Z11 | 0.01 | 0.40 | 122604 | 0.271552 | 0.30 | 23.861 | 1.27 | 0.637298 | 1.23 | 0.97 | 3315 | 5 | 3263 | 12 | 3178 | 31 | 95.88 | 97.4 |
| Z12 | 0.05 | 0.24 | 28820 | 0.132120 | 0.53 | 6.425 | 1.72 | 0.352684 | 1.64 | 0.95 | 2126 | 9 | 2036 | 15 | 1947 | 27 | 91.58 | 95.6 |
| Z13 | 0.14 | 0.21 | 11221 | 0.131870 | 0.75 | 6.382 | 2.71 | 0.351012 | 2.61 | 0.96 | 2123 | 13 | 2030 | 24 | 1939 | 43 | 91.35 | 95.5 |
| Z14 | 0.07 | 0.17 | 18625 | 0.192164 | 0.73 | 13.011 | 2.87 | 0.491051 | 2.77 | 0.97 | 2761 | 12 | 2680 | 27 | 2575 | 59 | 93.28 | 96.0 |
| Z15-1 | 0.02 | 0.51 | 74093 | 0.190109 | 0.38 | 12.366 | 1.83 | 0.471764 | 1.79 | 0.98 | 2743 | 6 | 2633 | 17 | 2491 | 37 | 90.82 | 94.6 |
| Z16 | 0.06 | 0.25 | 24816 | 0.192409 | 0.44 | 13.663 | 2.07 | 0.515024 | 2.03 | 0.98 | 2763 | 7 | 2727 | 19 | 2678 | 44 | 96.93 | 98.2 |
| Z17 | 0.03 | 0.18 | 43884 | 0.190124 | 0.43 | 11.458 | 1.45 | 0.437096 | 1.38 | 0.95 | 2743 | 7 | 2561 | 13 | 2338 | 27 | 85.21 | 91.2 |
| Z19 | 0.05 | 0.10 | 30407 | 0.134048 | 0.61 | 6.065 | 1.55 | 0.328171 | 1.42 | 0.92 | 2152 | 11 | 1985 | 13 | 1830 | 23 | 85.03 | 92.1 |
| Z21 | 0.01 | 0.17 | 113480 | 0.188925 | 0.41 | 13.788 | 1.63 | 0.529305 | 1.58 | 0.97 | 2733 | 7 | 2735 | 15 | 2739 | 35 | 100.21 | 100.1 |
| Z22 | 0.02 | 0.15 | 69188 | 0.232561 | 0.37 | 19.307 | 1.67 | 0.602117 | 1.62 | 0.97 | 3070 | 6 | 3057 | 16 | 3038 | 39 | 98.98 | 99.3 |
| Z25 | 0.05 | 0.21 | 30490 | 0.167791 | 0.66 | 10.905 | 1.96 | 0.471347 | 1.84 | 0.94 | 2536 | 11 | 2515 | 18 | 2489 | 38 | 98.18 | 98.9 |
| Z26 | 0.03 | 0.58 | 49896 | 0.128133 | 0.56 | 6.746 | 1.59 | 0.381818 | 1.49 | 0.94 | 2073 | 10 | 2079 | 14 | 2085 | 27 | 100.59 | 100.3 |
| Z27 | 0.07 | 0.23 | 20969 | 0.189465 | 0.62 | 13.290 | 2.43 | 0.508727 | 2.35 | 0.97 | 2738 | 10 | 2700 | 23 | 2651 | 51 | 96.85 | 98.1 |
| Z29 | 0.26 | 5.73 | 5790 | 0.125809 | 0.90 | 6.328 | 2.03 | 0.364822 | 1.82 | 0.90 | 2040 | 16 | 2022 | 18 | 2005 | 31 | 98.27 | 99.1 |
| Z31 | 0.03 | 0.38 | 42091 | 0.209640 | 0.49 | 16.538 | 1.64 | 0.572157 | 1.56 | 0.95 | 2903 | 8 | 2908 | 16 | 2917 | 37 | 100.48 | 100.2 |
| Z32 | 0.08 | 1.31 | 17396 | 0.175016 | 1.41 | 11.202 | 2.85 | 0.464197 | 2.48 | 0.87 | 2606 | 23 | 2540 | 26 | 2458 | 51 | 94.32 | 96.7 |
| Z33 | 0.05 | 0.65 | 29463 | 0.134323 | 0.45 | 7.037 | 1.58 | 0.379946 | 1.51 | 0.96 | 2155 | 8 | 2116 | 14 | 2076 | 27 | 96.32 | 98.1 |
| Z34 | 0.07 | 0.14 | 18290 | 0.190881 | 0.55 | 13.578 | 1.96 | 0.515923 | 1.88 | 0.96 | 2750 | 9 | 2721 | 18 | 2682 | 41 | 97.53 | 98.5 |
| Z35 | 0.02 | 0.27 | 75816 | 0.189392 | 0.53 | 12.005 | 1.58 | 0.459721 | 1.48 | 0.94 | 2737 | 9 | 2605 | 15 | 2438 | 30 | 89.09 | 93.6 |
| Z36 | 0.07 | 0.65 | 20403 | 0.172642 | 0.68 | 11.199 | 2.60 | 0.470462 | 2.51 | 0.96 | 2583 | 11 | 2540 | 24 | 2486 | 52 | 96.21 | 97.8 |
| Z37 | 0.02 | 0.12 | 57966 | 0.189632 | 0.49 | 13.899 | 1.45 | 0.531597 | 1.37 | 0.94 | 2739 | 8 | 2743 | 14 | 2748 | 31 | 100.34 | 100.1 |
| Z39 | 0.02 | 0.33 | 64854 | 0.262463 | 0.39 | 23.127 | 1.30 | 0.639072 | 1.23 | 0.95 | 3262 | 6 | 3232 | 13 | 3185 | 31 | 97.66 | 98.5 |
| Z40 | 0.02 | 1.04 | 89325 | 0.132512 | 0.46 | 7.527 | 1.20 | 0.411969 | 1.11 | 0.92 | 2132 | 8 | 2176 | 11 | 2224 | 21 | 104.33 | 102.1 |
| Z41 | 0.04 | 1.31 | 38146 | 0.190688 | 0.46 | 12.210 | 1.49 | 0.464389 | 1.42 | 0.95 | 2748 | 8 | 2621 | 14 | 2459 | 29 | 89.48 | 93.8 |
| Z42 | 0.03 | 0.37 | 42378 | 0.135920 | 0.41 | 7.527 | 1.25 | 0.401648 | 1.18 | 0.94 | 2176 | 7 | 2176 | 11 | 2177 | 22 | 100.04 | 100.0 |
| Z44 | 0.03 | 0.40 | 57174 | 0.129559 | 0.43 | 6.641 | 1.33 | 0.371749 | 1.25 | 0.95 | 2092 | 8 | 2065 | 12 | 2038 | 22 | 97.40 | 98.6 |
| Z45 | 0.02 | 0.33 | 58995 | 0.200636 | 0.40 | 15.128 | 1.83 | 0.546854 | 1.78 | 0.98 | 2831 | 7 | 2823 | 17 | 2812 | 40 | 99.32 | 99.6 |
| Z46 | 0.01 | 0.29 | 217209 | 0.182466 | 0.42 | 13.355 | 1.43 | 0.530831 | 1.36 | 0.96 | 2675 | 7 | 2705 | 13 | 2745 | 31 | 102.60 | 101.4 |
| Z47 | 0.01 | 0.28 | 185575 | 0.188850 | 0.43 | 14.188 | 1.14 | 0.544889 | 1.05 | 0.92 | 2732 | 7 | 2762 | 11 | 2804 | 24 | 102.62 | 101.5 |
| Z48 | 0.02 | 0.52 | 73714 | 0.190087 | 0.40 | 13.603 | 1.52 | 0.519027 | 1.47 | 0.96 | 2743 | 7 | 2722 | 14 | 2695 | 32 | 98.25 | 98.9 |
| Z49 | 0.00 | 0.29 | 268274 | 0.192322 | 0.29 | 14.476 | 1.23 | 0.545913 | 1.20 | 0.97 | 2762 | 5 | 2781 | 12 | 2808 | 27 | 101.67 | 100.9 |
| Z50 | 0.01 | 3.38 | 129052 | 0.201851 | 0.58 | 13.833 | 1.23 | 0.497048 | 1.08 | 0.88 | 2841 | 9 | 2738 | 12 | 2601 | 23 | 91.55 | 94.9 |
| Z51 | 0.02 | 0.87 | 90761 | 0.190801 | 0.38 | 11.823 | 1.39 | 0.449416 | 1.34 | 0.96 | 2749 | 6 | 2590 | 13 | 2393 | 27 | 87.03 | 92.3 |
| Z52 | 0.02 | 0.27 | 84989 | 0.190512 | 0.45 | 13.131 | 1.44 | 0.499884 | 1.37 | 0.95 | 2747 | 7 | 2689 | 14 | 2613 | 29 | 95.15 | 97.1 |
| Z53 | 0.01 | 0.36 | 156481 | 0.188449 | 0.36 | 11.617 | 1.15 | 0.447109 | 1.09 | 0.95 | 2729 | 6 | 2574 | 11 | 2382 | 22 | 87.31 | 92.5 |
| Z54 | 0.01 | 0.16 | 193522 | 0.174441 | 0.36 | 12.104 | 1.10 | 0.503264 | 1.04 | 0.94 | 2601 | 6 | 2613 | 10 | 2628 | 22 | 101.04 | 100.5 |
| Z58 | 0.01 | 0.25 | 151642 | 0.194972 | 0.39 | 13.044 | 1.23 | 0.485201 | 1.17 | 0.95 | 2785 | 6 | 2683 | 12 | 2550 | 25 | 91.57 | 95.0 |
| Z61 | 0.01 | 0.08 | 181454 | 0.195419 | 0.44 | 13.619 | 1.35 | 0.505437 | 1.27 | 0.94 | 2788 | 7 | 2724 | 13 | 2637 | 28 | 94.58 | 96.8 |
| Z62 | 0.01 | 0.51 | 130747 | 0.206429 | 0.37 | 14.968 | 1.34 | 0.525894 | 1.29 | 0.96 | 2878 | 6 | 2813 | 13 | 2724 | 29 | 94.66 | 96.8 |
| Z64 | 0.08 | 1.72 | 18320 | 0.166574 | 1.06 | 10.225 | 2.84 | 0.445184 | 2.64 | 0.93 | 2524 | 18 | 2455 | 26 | 2374 | 52 | 94.07 | 96.6 |
| Z65 | 0.22 | 0.42 | 6925 | 0.130262 | 1.09 | 6.707 | 3.16 | 0.373414 | 2.97 | 0.94 | 2102 | 19 | 2074 | 28 | 2045 | 52 | 97.33 | 98.6 |
| Z66 | 0.12 | 0.28 | 11171 | 0.238181 | 0.85 | 18.135 | 3.15 | 0.552225 | 3.03 | 0.96 | 3108 | 13 | 2997 | 30 | 2834 | 69 | 91.20 | 94.5 |
| Z67 | 0.02 | 0.50 | 61429 | 0.128035 | 0.48 | 6.613 | 1.19 | 0.374608 | 1.09 | 0.92 | 2071 | 8 | 2061 | 10 | 2051 | 19 | 99.03 | 99.5 |
|  |  |  |  |  |  |  |  |  |  |  | **Apparent ages (Ma)** | | | | | | **Concordance %** | |
| **Zircon** | **f206(%)** | **Th** | **206Pb** | **207Pb** | **err (%)** | **207Pb** | **err (%)** | **206Pb** | **err (%)** | **Rho** | **207Pb** |  | **207Pb** |  | **206Pb** |  | **6/8-7/6** | **6/8-7/5** |
|  |  | **U** | **204Pb** | **206Pb** | **1sigma** | **235U** | **1sigma** | **238U** | **1sigma** |  | **206Pb** | **1s** | **235U** | **1s** | **238U** | **1s** |  |  |
| *EK12* | *Metasandstone* | | | | | | | | | | | | | | | | | |
| Z01 | 0.01 | 0.44 | 149553 | 0.127402 | 0.79 | 6.216 | 1.54 | 0.353848 | 1.32 | 0.85 | 2062 | 14 | 2007 | 13 | 1953 | 22 | 94.69 | 97.3 |
| Z02 | 0.00 | 0.26 | 407200 | 0.183206 | 1.44 | 12.409 | 1.98 | 0.491253 | 1.35 | 0.67 | 2682 | 24 | 2636 | 18 | 2576 | 29 | 96.05 | 97.7 |
| Z03 | 0.00 | 0.12 | 376396 | 0.190739 | 0.53 | 12.988 | 1.15 | 0.493854 | 1.02 | 0.88 | 2749 | 9 | 2679 | 11 | 2587 | 22 | 94.13 | 96.5 |
| Z05 | 0.01 | 1.13 | 207403 | 0.200921 | 1.04 | 15.330 | 3.89 | 0.553389 | 3.75 | 0.96 | 2834 | 17 | 2836 | 37 | 2839 | 86 | 100.20 | 100.1 |
| Z07 | 0.00 | 0.33 | 327257 | 0.129667 | 0.75 | 6.948 | 1.87 | 0.388649 | 1.71 | 0.91 | 2093 | 13 | 2105 | 17 | 2117 | 31 | 101.10 | 100.5 |
| Z08 | 0.01 | 0.56 | 241040 | 0.127578 | 2.25 | 6.619 | 2.60 | 0.376303 | 1.29 | 0.70 | 2065 | 39 | 2062 | 23 | 2059 | 23 | 99.72 | 99.8 |
| Z11 | 0.01 | 0.39 | 162831 | 0.271805 | 0.65 | 25.132 | 1.37 | 0.670605 | 1.20 | 0.87 | 3316 | 10 | 3313 | 13 | 3308 | 31 | 99.75 | 99.8 |
| Z13 | 0.01 | 0.97 | 108360 | 0.182133 | 3.28 | 12.137 | 4.03 | 0.483286 | 2.34 | 0.58 | 2672 | 53 | 2615 | 37 | 2542 | 49 | 95.10 | 97.1 |
| Z14 | 0.00 | 0.19 | 525550 | 0.140992 | 0.83 | 7.646 | 2.08 | 0.393329 | 1.91 | 0.91 | 2239 | 14 | 2190 | 19 | 2138 | 35 | 95.48 | 97.6 |
| Z15 | 0.00 | 0.35 | 301656 | 0.179295 | 1.11 | 12.139 | 2.25 | 0.491042 | 1.96 | 0.87 | 2646 | 18 | 2615 | 21 | 2575 | 41 | 97.31 | 98.4 |
| Z16core | 0.03 | 0.29 | 51977 | 0.133015 | 0.97 | 6.598 | 1.89 | 0.359750 | 1.62 | 0.85 | 2138 | 17 | 2059 | 16 | 1981 | 28 | 92.65 | 96.2 |
| Z16rim | 0.00 | 0.48 | 418671 | 0.133646 | 0.93 | 7.006 | 1.35 | 0.380214 | 0.97 | 0.81 | 2146 | 16 | 2112 | 12 | 2077 | 17 | 96.78 | 98.3 |
| Z17 | 0.00 | 0.37 | 315954 | 0.188590 | 0.62 | 13.709 | 1.39 | 0.527208 | 1.24 | 0.89 | 2730 | 10 | 2730 | 13 | 2730 | 28 | 99.99 | 99.9 |
| Z18 | 0.02 | 0.33 | 88925 | 0.166300 | 1.37 | 10.148 | 1.81 | 0.442554 | 1.19 | 0.82 | 2521 | 23 | 2448 | 17 | 2362 | 23 | 93.70 | 96.4 |
| Z22 | 1.41 | 0.45 | 1081 | 0.124719 | 0.77 | 5.998 | 4.15 | 0.348803 | 4.02 | 0.98 | 2025 | 14 | 1976 | 36 | 1929 | 68 | 95.26 | 97.6 |
| Z24 | 0.04 | 0.33 | 33703 | 0.130342 | 2.73 | 6.733 | 4.37 | 0.374649 | 3.41 | 0.92 | 2103 | 47 | 2077 | 38 | 2051 | 60 | 97.56 | 98.7 |
| Z25 | 0.01 | 0.54 | 220239 | 0.189131 | 0.76 | 12.578 | 3.15 | 0.482330 | 3.05 | 0.97 | 2735 | 12 | 2649 | 29 | 2537 | 64 | 92.79 | 95.8 |
| Z27 | 0.03 | 0.21 | 51634 | 0.194266 | 0.72 | 14.648 | 1.57 | 0.546870 | 1.39 | 0.93 | 2779 | 12 | 2793 | 15 | 2812 | 32 | 101.21 | 100.6 |
| Z29 | 0.03 | 0.32 | 46876 | 0.140750 | 2.47 | 7.520 | 2.67 | 0.387518 | 1.02 | 0.37 | 2236 | 42 | 2175 | 24 | 2111 | 18 | 94.40 | 97.0 |
| Z31 | 0.02 | 0.65 | 62457 | 0.128604 | 0.97 | 6.671 | 1.73 | 0.376227 | 1.44 | 0.91 | 2079 | 17 | 2069 | 15 | 2059 | 25 | 99.02 | 99.5 |
| Z32 | 0.01 | 0.37 | 176621 | 0.161697 | 0.66 | 10.298 | 1.34 | 0.461918 | 1.17 | 0.86 | 2473 | 11 | 2462 | 12 | 2448 | 24 | 98.97 | 99.4 |
| Z33 | 0.85 | 0.46 | 1761 | 0.134632 | 1.68 | 7.039 | 2.20 | 0.379180 | 1.41 | 0.63 | 2159 | 29 | 2116 | 19 | 2072 | 25 | 95.98 | 97.9 |
| Z35 | 0.02 | 0.89 | 77494 | 0.191146 | 0.93 | 13.800 | 1.79 | 0.523606 | 1.54 | 0.93 | 2752 | 15 | 2736 | 17 | 2714 | 34 | 98.63 | 99.2 |
| Z37 | 0.71 | 0.35 | 2098 | 0.132608 | 0.58 | 6.986 | 2.27 | 0.382102 | 2.20 | 0.97 | 2133 | 10 | 2110 | 20 | 2086 | 39 | 97.81 | 98.8 |
| Z38 | 1.70 | 0.16 | 848 | 0.158301 | 1.49 | 9.563 | 1.92 | 0.438137 | 1.21 | 0.62 | 2438 | 25 | 2394 | 18 | 2342 | 24 | 96.09 | 97.8 |
| Z40 | 0.18 | 0.98 | 8320 | 0.127106 | 2.11 | 6.185 | 3.33 | 0.352928 | 2.58 | 0.77 | 2058 | 37 | 2002 | 29 | 1949 | 43 | 94.67 | 97.3 |
| Z41 | 0.01 | 0.35 | 108519 | 0.130120 | 1.01 | 6.506 | 1.73 | 0.362614 | 1.41 | 0.81 | 2100 | 18 | 2047 | 15 | 1995 | 24 | 95.00 | 97.4 |
| Z42 | 0.02 | 0.77 | 80082 | 0.129551 | 0.97 | 6.172 | 1.90 | 0.345545 | 1.63 | 0.86 | 2092 | 17 | 2001 | 16 | 1913 | 27 | 91.46 | 95.6 |
|  |  |  |  |  |  |  |  |  |  |  | **Apparent ages (Ma)** | | | | | | **Concordance %** | |
| **Zircon** | **f206(%)** | **Th** | **206Pb** | **207Pb** | **err (%)** | **207Pb** | **err (%)** | **206Pb** | **err (%)** | **Rho** | **207Pb** |  | **207Pb** |  | **206Pb** |  | **6/8-7/6** | **6/8-7/5** |
|  |  | **U** | **204Pb** | **206Pb** | **1sigma** | **235U** | **1sigma** | **238U** | **1sigma** |  | **206Pb** | **1s** | **235U** | **1s** | **238U** | **1s** |  |  |
| *EK4_240* | *Metasandstone* | | | | | | | | | | | | | | | | | |
| Z04 | 0.01 | 0.28 | 145450 | 0.166319 | 1.49 | 10.268 | 1.96 | 0.447754 | 1.28 | 0.84 | 2521 | 25 | 2459 | 18 | 2385 | 25 | 94.62 | 96.9 |
| Z05 | 0.01 | 0.05 | 148761 | 0.197301 | 0.40 | 13.987 | 1.39 | 0.514160 | 1.33 | 0.96 | 2804 | 7 | 2749 | 13 | 2674 | 29 | 95.38 | 97.2 |
| Z06 | 0.01 | 0.49 | 113383 | 0.191647 | 0.66 | 13.497 | 2.22 | 0.510794 | 2.12 | 0.95 | 2756 | 11 | 2715 | 21 | 2660 | 46 | 96.51 | 97.9 |
| Z07 | 0.03 | 0.52 | 49602 | 0.200809 | 1.00 | 15.106 | 1.84 | 0.545600 | 1.54 | 0.83 | 2833 | 16 | 2822 | 17 | 2807 | 35 | 99.08 | 99.4 |
| Z08 | 0.00 | 0.11 | 736565 | 0.160889 | 0.60 | 11.192 | 1.20 | 0.504531 | 1.05 | 0.91 | 2465 | 10 | 2539 | 11 | 2633 | 23 | 106.82 | 103.7 |
| Z11 | 0.00 | 0.36 | 345441 | 0.214398 | 0.58 | 18.713 | 1.28 | 0.633020 | 1.13 | 0.88 | 2939 | 9 | 3027 | 12 | 3162 | 28 | 107.57 | 104.4 |
| Z12 | 0.01 | 0.20 | 151351 | 0.217361 | 3.62 | 16.328 | 4.42 | 0.544825 | 2.54 | 0.81 | 2961 | 57 | 2896 | 41 | 2804 | 58 | 94.68 | 96.8 |
| Z13 | 0.00 | 0.15 | 432458 | 0.130802 | 0.49 | 7.221 | 1.43 | 0.400393 | 1.34 | 0.94 | 2109 | 9 | 2139 | 13 | 2171 | 25 | 102.94 | 101.4 |
| Z14 | 0.00 | 0.15 | 297222 | 0.126458 | 0.37 | 7.041 | 1.74 | 0.403806 | 1.69 | 0.98 | 2049 | 7 | 2117 | 15 | 2187 | 31 | 106.70 | 103.3 |
| Z15 | 0.01 | 0.59 | 122040 | 0.165845 | 0.40 | 11.506 | 1.67 | 0.503185 | 1.62 | 0.97 | 2516 | 7 | 2565 | 15 | 2627 | 35 | 104.42 | 102.4 |
| Z17 | 0.00 | 0.35 | 518718 | 0.167255 | 0.41 | 11.654 | 1.39 | 0.505369 | 1.32 | 0.95 | 2530 | 7 | 2577 | 13 | 2637 | 29 | 104.21 | 102.3 |
| Z18 | 0.00 | 0.11 | 591017 | 0.161799 | 0.39 | 10.166 | 0.94 | 0.455682 | 0.86 | 0.90 | 2475 | 7 | 2450 | 9 | 2420 | 17 | 97.81 | 98.7 |
| Z20 | 0.01 | 0.36 | 235990 | 0.259122 | 0.99 | 23.158 | 1.47 | 0.648172 | 1.08 | 0.88 | 3241 | 16 | 3234 | 14 | 3221 | 27 | 99.37 | 99.6 |
| Z21 | 0.00 | 0.14 | 412373 | 0.166434 | 0.36 | 10.974 | 1.64 | 0.478201 | 1.60 | 0.98 | 2522 | 6 | 2521 | 15 | 2519 | 33 | 99.89 | 99.9 |
| Z24 | 0.00 | 0.26 | 403651 | 0.131340 | 0.98 | 7.129 | 1.77 | 0.393651 | 1.47 | 0.93 | 2116 | 17 | 2128 | 16 | 2140 | 27 | 101.12 | 100.5 |
| Z25 | 0.00 | 0.41 | 448253 | 0.128968 | 0.47 | 6.801 | 1.60 | 0.382486 | 1.53 | 0.95 | 2084 | 8 | 2086 | 14 | 2088 | 27 | 100.19 | 100.0 |
| Z26 | 0.00 | 0.08 | 832943 | 0.162392 | 0.44 | 10.452 | 2.03 | 0.466785 | 1.98 | 0.98 | 2481 | 7 | 2476 | 19 | 2469 | 41 | 99.55 | 99.7 |
| Z27 | 0.01 | 0.36 | 130010 | 0.238825 | 0.61 | 19.505 | 1.49 | 0.592326 | 1.36 | 0.91 | 3112 | 10 | 3067 | 14 | 2999 | 33 | 96.36 | 97.7 |
| Z28 | 0.00 | 0.51 | 563920 | 0.199953 | 0.44 | 13.803 | 1.66 | 0.500649 | 1.60 | 0.98 | 2826 | 7 | 2736 | 16 | 2617 | 34 | 92.60 | 95.6 |
| Z29 | 0.01 | 0.47 | 272932 | 0.128349 | 0.46 | 6.221 | 1.79 | 0.351535 | 1.73 | 0.97 | 2075 | 8 | 2007 | 16 | 1942 | 29 | 93.57 | 96.7 |
| Z31 | 0.00 | 0.22 | 427024 | 0.272055 | 0.67 | 24.165 | 3.02 | 0.644201 | 2.94 | 0.98 | 3318 | 10 | 3275 | 29 | 3206 | 74 | 96.61 | 97.8 |
| Z32 | 0.00 | 0.34 | 592526 | 0.147048 | 0.67 | 9.511 | 1.26 | 0.469110 | 1.07 | 0.91 | 2312 | 11 | 2389 | 12 | 2480 | 22 | 107.26 | 103.8 |
| Z36 | 0.01 | 0.64 | 169168 | 0.186952 | 0.87 | 13.774 | 1.20 | 0.534342 | 0.83 | 0.83 | 2716 | 14 | 2734 | 11 | 2760 | 19 | 101.63 | 100.9 |
| Z37 | 0.00 | 0.08 | 924594 | 0.130266 | 0.43 | 6.417 | 2.27 | 0.357279 | 2.23 | 0.98 | 2102 | 7 | 2035 | 20 | 1969 | 38 | 93.71 | 96.7 |
| Z38 | 0.00 | 0.62 | 1002510 | 0.192290 | 0.36 | 15.103 | 0.77 | 0.569642 | 0.67 | 0.85 | 2762 | 6 | 2822 | 7 | 2906 | 16 | 105.23 | 102.9 |
| Z39 | 0.00 | 0.02 | 1094194 | 0.159798 | 0.45 | 10.863 | 1.24 | 0.493047 | 1.15 | 0.93 | 2454 | 8 | 2511 | 11 | 2584 | 24 | 105.31 | 102.8 |
| Z40 | 0.00 | 0.32 | 792447 | 0.159141 | 0.69 | 10.741 | 1.81 | 0.489514 | 1.67 | 0.96 | 2447 | 12 | 2501 | 17 | 2569 | 35 | 104.99 | 102.7 |
| Z41 | 0.00 | 0.35 | 2131669 | 0.183272 | 1.04 | 13.761 | 2.64 | 0.544571 | 2.42 | 0.92 | 2683 | 17 | 2733 | 25 | 2803 | 55 | 104.47 | 102.5 |
| Z43 | 0.00 | 0.00 | 883220 | 0.130555 | 0.37 | 7.415 | 1.23 | 0.411907 | 1.17 | 0.95 | 2105 | 6 | 2163 | 11 | 2224 | 22 | 105.61 | 102.8 |
| Z44 | 0.01 | 0.34 | 233089 | 0.180011 | 0.62 | 13.406 | 4.35 | 0.540139 | 4.31 | 1.00 | 2653 | 10 | 2709 | 40 | 2784 | 97 | 104.94 | 102.7 |
| Z45 | 0.00 | 0.17 | 632315 | 0.185116 | 1.63 | 14.771 | 2.03 | 0.578699 | 1.20 | 0.58 | 2699 | 27 | 2801 | 19 | 2943 | 28 | 109.05 | 105.1 |
| Z46 | 0.00 | 0.43 | 488539 | 0.130176 | 0.40 | 7.130 | 1.34 | 0.397272 | 1.28 | 0.95 | 2100 | 7 | 2128 | 12 | 2156 | 23 | 102.67 | 101.3 |
| Z47 | 0.00 | 0.44 | 337771 | 0.185929 | 1.11 | 13.444 | 1.36 | 0.524419 | 0.79 | 0.55 | 2706 | 18 | 2711 | 13 | 2718 | 17 | 100.42 | 100.2 |
| Z50 | 0.00 | 0.27 | 550043 | 0.175172 | 0.33 | 13.109 | 1.20 | 0.542737 | 1.15 | 0.96 | 2608 | 5 | 2687 | 11 | 2795 | 26 | 107.18 | 103.9 |
| Z51 | 0.00 | 0.66 | 558296 | 0.188203 | 0.34 | 15.156 | 0.82 | 0.584051 | 0.74 | 0.90 | 2727 | 6 | 2825 | 8 | 2965 | 18 | 108.76 | 104.9 |
| Z55 | 0.00 | 0.01 | 385329 | 0.171657 | 1.09 | 12.658 | 1.42 | 0.534819 | 0.91 | 0.62 | 2574 | 18 | 2655 | 13 | 2762 | 20 | 107.30 | 104.0 |
| Z57 | 0.00 | 0.14 | 450995 | 0.177627 | 1.41 | 12.662 | 1.90 | 0.517006 | 1.27 | 0.66 | 2631 | 23 | 2655 | 18 | 2686 | 28 | 102.11 | 101.1 |
|  |  |  |  |  |  |  |  |  |  |  | **Apparent ages (Ma)** | | | | | | **Concordance %** | |
| **Zircon** | **f206(%)** | **Th** | **206Pb** | **207Pb** | **err (%)** | **207Pb** | **err (%)** | **206Pb** | **err (%)** | **Rho** | **207Pb** |  | **207Pb** |  | **206Pb** |  | **6/8-7/6** |  |
|  |  | **U** | **204Pb** | **206Pb** | **1sigma** | **235U** | **1sigma** | **238U** | **1sigma** |  | **206Pb** | **1s** | **235U** | **1s** | **238U** | **1s** |  |  |
| *SG34* | *Metaconglomerate* | | | | | | | | | | | | | | | | | |
| ZR01 | 1.09 | 0.35 | 1156 | 0.242622 | 0.66 | 20.702 | 1.16 | 0.618802 | 0.88 | 0.76 | 3137 | 21 | 3125 | 22 | 3105 | 43 | 98.98 |  |
| ZR02 | 0.45 | 0.45 | 2952 | 0.204094 | 0.48 | 14.614 | 1.07 | 0.519280 | 0.88 | 0.82 | 2859 | 16 | 2790 | 20 | 2696 | 39 | 94.30 |  |
| ZR03 | 0.44 | 0.50 | 3048 | 0.203698 | 0.45 | 16.954 | 0.91 | 0.603603 | 0.70 | 0.77 | 2856 | 14 | 2932 | 17 | 3044 | 34 | 106.59 |  |
| ZR03core | 0.13 | 0.26 | 9482 | 0.259218 | 0.70 | 25.525 | 1.29 | 0.714115 | 1.02 | 0.79 | 3242 | 22 | 3329 | 25 | 3474 | 55 | 107.16 |  |
| ZR04 | 1.01 | 0.45 | 1391 | 0.168603 | 2.34 | 12.082 | 3.56 | 0.519699 | 2.66 | 0.75 | 2544 | 78 | 2611 | 66 | 2698 | 117 | 106.06 |  |
| ZR05 | 0.06 | 0.26 | 24455 | 0.168377 | 0.76 | 12.089 | 1.86 | 0.520684 | 1.66 | 0.89 | 2542 | 25 | 2611 | 35 | 2702 | 73 | 106.32 |  |
| ZR06 | 0.20 | 0.10 | 7174 | 0.159263 | 0.88 | 10.636 | 1.46 | 0.484309 | 1.10 | 0.75 | 2448 | 30 | 2492 | 27 | 2546 | 46 | 104.01 |  |
| ZR07 | 0.01 | 0.27 | 121493 | 0.216634 | 0.99 | 18.927 | 1.52 | 0.633620 | 1.09 | 0.72 | 2956 | 32 | 3038 | 29 | 3164 | 54 | 107.04 |  |
| ZR08 | 0.03 | 0.27 | 44395 | 0.165662 | 0.75 | 9.724 | 3.03 | 0.425685 | 2.91 | 0.96 | 2514 | 25 | 2409 | 55 | 2286 | 111 | 90.93 |  |
| ZR11 | 0.05 | 0.23 | 32362 | 0.126142 | 0.53 | 6.138 | 1.34 | 0.352881 | 1.17 | 0.87 | 2045 | 19 | 1996 | 23 | 1948 | 39 | 95.28 |  |
| ZR12 | 0.07 | 0.16 | 16008 | 0.351275 | 0.61 | 34.937 | 1.62 | 0.721276 | 1.45 | 0.90 | 3713 | 19 | 3637 | 32 | 3501 | 78 | 94.30 |  |
| ZR15 | 0.01 | 0.42 | 197471 | 0.169946 | 0.59 | 11.974 | 1.62 | 0.510961 | 1.46 | 0.90 | 2557 | 20 | 2602 | 30 | 2661 | 64 | 104.05 |  |
| ZR20 | 0.18 | 0.53 | 7860 | 0.160876 | 0.50 | 10.393 | 1.03 | 0.468510 | 0.82 | 0.80 | 2465 | 17 | 2470 | 19 | 2477 | 34 | 100.49 |  |
| ZR23 | 0.24 | 0.44 | 5813 | 0.170615 | 0.63 | 11.965 | 1.14 | 0.508569 | 0.87 | 0.76 | 2564 | 21 | 2602 | 21 | 2651 | 38 | 103.39 |  |
| ZR24 | 0.15 | 0.38 | 9894 | 0.128970 | 0.78 | 7.381 | 1.61 | 0.415018 | 1.36 | 0.85 | 2084 | 27 | 2159 | 29 | 2238 | 51 | 107.38 |  |
| ZR25rim | 0.05 | 0.17 | 27455 | 0.167044 | 0.98 | 12.129 | 1.87 | 0.526557 | 1.54 | 0.83 | 2528 | 33 | 2614 | 35 | 2727 | 68 | 107.86 |  |
| ZR26 | 0.10 | 0.35 | 14852 | 0.131264 | 1.68 | 7.469 | 2.61 | 0.412671 | 1.97 | 0.75 | 2115 | 58 | 2169 | 46 | 2227 | 74 | 105.30 |  |
| ZR27 | 0.12 | 1.04 | 11162 | 0.170852 | 2.29 | 12.013 | 3.61 | 0.509903 | 2.77 | 0.77 | 2566 | 75 | 2605 | 67 | 2656 | 120 | 103.52 |  |
| ZR29 | 0.02 | 0.18 | 69088 | 0.161722 | 0.77 | 10.758 | 1.75 | 0.482419 | 1.53 | 0.87 | 2474 | 26 | 2502 | 32 | 2538 | 64 | 102.59 |  |
| ZR31 | 0.02 | 0.06 | 89297 | 0.186945 | 0.89 | 14.534 | 1.42 | 0.563824 | 1.04 | 0.73 | 2715 | 29 | 2785 | 27 | 2882 | 48 | 106.15 |  |
| ZR33 | 0.01 | 0.21 | 194574 | 0.259156 | 0.61 | 25.088 | 1.19 | 0.702043 | 0.95 | 0.80 | 3242 | 19 | 3312 | 23 | 3428 | 51 | 105.76 |  |
| ZR36 | 0.16 | 0.36 | 7862 | 0.268530 | 0.79 | 27.046 | 2.30 | 0.730435 | 2.12 | 0.92 | 3297 | 25 | 3385 | 45 | 3535 | 115 | 107.20 |  |
| ZR40 | 0.24 | 0.25 | 6240 | 0.131495 | 0.68 | 6.959 | 3.40 | 0.383801 | 3.31 | 0.97 | 2118 | 24 | 2106 | 60 | 2094 | 118 | 98.87 |  |
| ZR42 | 0.02 | 0.09 | 84031 | 0.199670 | 0.61 | 13.961 | 3.78 | 0.507060 | 3.71 | 0.98 | 2824 | 20 | 2747 | 70 | 2644 | 160 | 93.64 |  |
| ZR46 | 0.99 | 0.62 | 1515 | 0.126193 | 1.11 | 6.045 | 2.24 | 0.347415 | 1.92 | 0.85 | 2046 | 39 | 1982 | 39 | 1922 | 64 | 93.97 |  |
| ZR48 | 0.15 | 0.27 | 9552 | 0.155208 | 0.65 | 8.751 | 2.43 | 0.408878 | 2.31 | 0.95 | 2404 | 22 | 2312 | 44 | 2210 | 86 | 91.92 |  |
| ZR49 | 0.01 | 0.46 | 116911 | 0.127212 | 0.68 | 7.190 | 2.67 | 0.409876 | 2.55 | 0.96 | 2060 | 24 | 2135 | 47 | 2214 | 95 | 107.50 |  |
| ZR51 | 0.69 | 0.22 | 2045 | 0.159965 | 0.59 | 11.435 | 1.23 | 0.518432 | 1.01 | 0.82 | 2455 | 20 | 2559 | 23 | 2693 | 44 | 109.66 |  |
| ZR52 | 0.37 | 0.17 | 3578 | 0.203711 | 0.72 | 14.865 | 3.38 | 0.529202 | 3.28 | 0.97 | 2856 | 23 | 2807 | 63 | 2738 | 145 | 95.87 |  |
| ZR53 | 0.21 | 0.45 | 5366 | 0.340204 | 0.78 | 38.866 | 2.02 | 0.828509 | 1.83 | 0.90 | 3664 | 24 | 3742 | 40 | 3890 | 106 | 106.19 |  |
| ZR54 | 0.91 | 0.24 | 1444 | 0.211717 | 1.11 | 16.852 | 1.63 | 0.577246 | 1.14 | 0.70 | 2919 | 36 | 2926 | 31 | 2938 | 54 | 100.64 |  |
| ZR57 | 1.89 | 0.43 | 784 | 0.135528 | 1.83 | 6.770 | 3.17 | 0.362261 | 2.57 | 0.81 | 2171 | 63 | 2082 | 55 | 1993 | 88 | 91.80 |  |
| ZR57-2 | 0.07 | 0.42 | 21595 | 0.131609 | 1.65 | 7.359 | 2.38 | 0.405485 | 1.67 | 0.70 | 2120 | 57 | 2156 | 42 | 2194 | 62 | 103.52 |  |
| ZR58-2 | 0.05 | 0.51 | 25781 | 0.177310 | 2.61 | 12.965 | 3.63 | 0.530295 | 2.50 | 0.69 | 2628 | 85 | 2677 | 67 | 2743 | 111 | 104.37 |  |
| ZR61 | 0.06 | 0.23 | 24078 | 0.190169 | 2.57 | 14.375 | 4.67 | 0.548189 | 3.88 | 0.83 | 2744 | 83 | 2775 | 87 | 2818 | 176 | 102.70 |  |
| ZR62 | 0.17 | 0.29 | 7947 | 0.172601 | 1.62 | 12.475 | 3.15 | 0.524144 | 2.67 | 0.85 | 2583 | 54 | 2641 | 58 | 2717 | 118 | 105.18 |  |
| ZR63 | 0.29 | 0.52 | 4706 | 0.189273 | 1.77 | 13.775 | 3.25 | 0.527813 | 2.70 | 0.83 | 2736 | 58 | 2734 | 61 | 2732 | 120 | 99.87 |  |
| ZR64 | 0.04 | 0.47 | 34058 | 0.139550 | 0.92 | 8.074 | 2.10 | 0.419588 | 1.85 | 0.88 | 2222 | 32 | 2239 | 38 | 2259 | 70 | 101.66 |  |
| ZR65 | 0.02 | 0.35 | 77070 | 0.193565 | 0.69 | 15.546 | 1.33 | 0.582454 | 1.08 | 0.81 | 2773 | 23 | 2849 | 25 | 2959 | 51 | 106.71 |  |
| ZR66 | 0.04 | 0.20 | 36751 | 0.193868 | 0.85 | 15.377 | 1.29 | 0.575207 | 0.90 | 0.69 | 2775 | 28 | 2839 | 24 | 2929 | 42 | 105.55 |  |
| ZR67 | 0.04 | 0.50 | 38032 | 0.127034 | 1.20 | 7.286 | 1.95 | 0.415971 | 1.48 | 0.76 | 2057 | 42 | 2147 | 34 | 2242 | 56 | 108.98 |  |
